# Supplementary material
Source: PubMed Central journal article supplement (PMC8378833)
Supplement: mmc1.pdf [file mmc1.pdf]

# THE LANCET

## Respiratory Medicine

### Supplementary appendix 1

This appendix formed part of the original submission and has been peer reviewed. We post it as supplied by the authors.

Supplement to: Ehrmann S, Li J, Ibarra-Estrada M, et al. Awake prone positioning for COVID-19 acute hypoxaemic respiratory failure: a randomised, controlled, multinational, open-label meta-trial. *Lancet Respir Med* 2021; published online August 20. [http://dx.doi.org/10.1016/S2213-2600\(21\)00356-8](http://dx.doi.org/10.1016/S2213-2600(21)00356-8).

# Awake prone positioning for COVID-19 acute hypoxaemic respiratory failure: A randomized, controlled, multinational, open-label meta-trial

## Supplementary appendix

### 1. Awake Prone Positioning Meta-Trial Group

- 1.1. Authors' contribution p 2
- 1.2. Investigators from each participating center p 3

### 2. Methods

- 2.1. Table S1. Inclusion and exclusion criteria in individual trials p 5
- 2.2. Table S2. Standard management in individual trials p 7

### 3. Results

- 3.1. Figure S1. Three interim analyses results p 8
- 3.2. Table S3. Repeated confidence intervals of the primary outcome p 9
- 3.3. Baseline demographic and disease characteristics in the awake prone positioning group and standard care group in individual trials
  - 3.3.1. Table S4. American trial p 10
  - 3.3.2. Table S5. Canadian trial p 11
  - 3.3.3. Table S6. French trial p 12
  - 3.3.4. Table S7. Irish trial p 13
  - 3.3.5. Table S8. Mexican trial p 14
  - 3.3.6. Table S9. Spanish trial p 15
- 3.4. Daily duration of time spent in prone positioning in individual trials p 16
  - 3.4.1. Figure S2 Boxplots durations of prone positioning (in hours per day from Day 0 to Day 14) in both groups
  - 3.4.2. Table S10. Description of the duration of prone positioning (in hours per day from Day 0 to Day 14) in individual trials
- 3.5. Investigation of heterogeneity between trials
  - 3.5.1. Figure S3. Forest plot with mixed effects linear model with group as a fixed effect and country as a random effect on intubation or death (primary outcome) at day 28 p 17
  - 3.5.2. Figure S4. Forest plot with mixed effects linear model with group as a fixed effect and country as a random effect on intubation at day p 18
  - 3.5.3. Figure S5. Forest plot with mixed effects linear model with group as a fixed effect and country as a random effect on death at day 28 p 18
- 3.6. Interaction between subgroups according to severity ( $SpO_2/FiO_2 < 190$  vs  $\geq 190$ )
  - 3.6.1. Figure S6. Subgroup analysis of the primary outcome according to the severity at enrollment p 19
- 3.7. Per-protocol analysis p 20

## **1.1 Authors' contribution**

SE, JL and ET designed the meta-trial project.

MIE, YP, SE, JL, DV, SM, BM, JGL, DC, IP and OR designed and conducted the individual trials. All authors significantly contributed to the conduct of the meta-trial, attending monthly web meetings. ET conducted data analysis.

IP, BM, JL, YP, SE, ET, MIE, and OR drafted the manuscript.

All authors reviewed the manuscript for important intellectual content, and approved the final manuscript.

SE, JL, MIE, YP, IP, BM and OR equally contributed to the overall project described in this article.

The authors sincerely thank Richard Kallet (University of California, San Francisco at San Francisco General Hospital and Trauma Center, San Francisco, California, United States), Paolo Biselli (University Hospital, University of São Paulo, São Paulo, Brazil) for acting as independent advisory board of the meta-trial steering committee.

We also thank the member of data safety monitoring board, Andrew Smyth (National University of Ireland, Galway, Ireland) for his oversight in the Irish trial.

## 1.2 Investigators from each participating center

| Center                                                                                                                         | PI(s)                           | Investigators                                                                                                                                                                                                                     |
|--------------------------------------------------------------------------------------------------------------------------------|---------------------------------|-----------------------------------------------------------------------------------------------------------------------------------------------------------------------------------------------------------------------------------|
| Rush University Medical Center, Chicago, IL, USA.                                                                              | Jie Li, Sara Mirza, David Vines | Ahmad A Elshafei, Brady J. Scott, Tyler Weiss, Ramandeep Kaur, Lauren J Harnois, Amanda Miller, Flor Cerda, Andrew Klein, Jacob R Burd, Kathleen Posa-Kearney                                                                     |
| Unity Point Health-Des Moines, Des Moines, IA, USA                                                                             | Matthew Trump                   | Julie Jackson, Trevor Oetting, Mark Greenwood, Lindsay Hazel, Lisa Kingery                                                                                                                                                        |
| Baylor University Medical Center, Dallas, TX, USA                                                                              | Idrees Mogri                    | Lindsey Morris, Joon Yong Moon, Julianne Gamett                                                                                                                                                                                   |
| University of Michigan Medical School, Ann Arbor, MI, USA                                                                      | Shijing Jia                     | Kristine Nelson                                                                                                                                                                                                                   |
| Galway University Hospitals, Ireland                                                                                           | Bairbre McNicholas              | David Cosgrave, Camilla Giacomini, John Laffey, Aoife Brennan, Conor Judge, Maeve Kernan, Claire Kelly, Ritika Ranjan, Siobhan Casey, Kevin O'Connell, Evelyn Newell, David Gallagher                                             |
| University College Dublin, Ireland                                                                                             |                                 | Alistair Nichol                                                                                                                                                                                                                   |
| Beaumont Hospital, Royal College of Surgeons, Dublin, Ireland                                                                  |                                 | Ger Curley                                                                                                                                                                                                                        |
| Hospital Civil Fray Antonio Alcalde. Guadalajara, Jalisco, México.                                                             | Miguel Ibarra Estrada           | Roxana García-Salcido, Alexandra Vargas-Obieta, Guadalupe Aguirre-Avalos, Sara A Aguirre-Díaz, Luz Alcántar-Vallín, Montserrat Alvarado-Padilla, Quetzalcóatl Chávez-Peña, José A. López-Pulgarín, Julio C Mijangos-Méndez.       |
| Hospital General de Occidente. Guadalajara, Jalisco, México.                                                                   | Miguel Marín-Rosales            | Jorge E García-Alvarado, Oscar G Baltazar-González, Maura C González-Guerrero, Paola G Gutiérrez Ramírez                                                                                                                          |
| Hôpital de Verdun, Montréal, Québec, Canada                                                                                    | Ivan Pavlov                     | Sean Gilman, Patrice Plamondon, Rachel Roy                                                                                                                                                                                        |
| Royal Victoria Hospital and Montreal General Hospital, both part of the McGill University Healthcare, Montréal, Québec, Canada | Dev Jayaraman, Jason Shahin     | Raham Ragoshai, Aasmine Kaur, Josie Campisi                                                                                                                                                                                       |
| Hôpital de la Cité-de-la-Santé, Laval, Québec, Canada                                                                          | Joseph Dahine                   | Stefanie Perron, Slimane Achouri, Ronald Racette                                                                                                                                                                                  |
| Hôpital de Gaspé, Gaspé, Québec, Canada                                                                                        | Anne Kulenkamp                  |                                                                                                                                                                                                                                   |
| Hospital Universitari Vall d'Hebron, Spain                                                                                     | Oriol Roca                      | Andrés Pacheco, Marina García-de-Acilu                                                                                                                                                                                            |
| Hospital Universitari del Mar, Spain                                                                                           | Joan R. Masclans                | Irene Dot                                                                                                                                                                                                                         |
| CHRU Tours, Hôpital Bretonneau, Tours France                                                                                   | Yonatan Perez                   | Laetitia Bodet-Contentin, Denis Garot, Stephan Ehrmann, Emmanuelle Mercier, Charlotte Salmon Gandonnière, Marlène Morisseau, Youenn Jouan, Walid Darwiche, Annick Legras, Antoine Guillon, Elsa Tavernier, Pierre-François Dequin |
| CHRU Tours, Hôpital Trousseau, Tours, France                                                                                   | Anne-Charlotte Tellier          |                                                                                                                                                                                                                                   |
| CHU de Nantes, Nantes, France                                                                                                  | Jean Reignier                   | Jean-Baptiste Lascarrou, Amélie Seguin, Luc Desmedt, Emmanuel Canet                                                                                                                                                               |
| CH Le Mans, Le Mans, France                                                                                                    | Christophe Guitton              | Rémy Marnai, Jean-Christophe Callahan, Mickaël Landais, Nicolas Chudeau, Cédric Darreau, Patrice Tirot, Marjorie Saint Martin, Charlene Le Moal.                                                                                  |
| CHR Orléans, Orléans, France                                                                                                   | Mai-Anh Nay                     | Grégoire Muller, Sophie Jacquier                                                                                                                                                                                                  |
| CHU Cavale Blanche, Brest, France                                                                                              | Gwenaél Prat                    | Pierre Bailly, Nicolas Ferrière                                                                                                                                                                                                   |
| CHU Poitiers, Poitiers, France                                                                                                 | Arnaud W Thille                 | Jean-Pierre Frat                                                                                                                                                                                                                  |
| CHU de Nice, Nice, France                                                                                                      | Jean Dellamonica                | Clément Saccheri, Matthieu Buscot                                                                                                                                                                                                 |
| CH Victor Dupouy, Argenteuil, France                                                                                           | Gaëtan Plantefève               | Damien Contou                                                                                                                                                                                                                     |
| Assistance publique – Hôpitaux de Paris, Hôpital Louis Mourier, Colombes, France                                               | Damien Roux                     | Jean-Damien Ricard, Laura Federici, Noémie Zucman, Santiago Freita, Ramos, Marc Amouretti, Sébastien Besset, Coralie Gemez                                                                                                        |
| CHBA Vannes, Vannes, France                                                                                                    | Agathe Delbove                  |                                                                                                                                                                                                                                   |
| Assistance publique – Hôpitaux de Paris, Hôpital Tenon, Paris, France                                                          | Guillaume Voiriot               | Alexandre Elabbadi, Muriel Fartoukh                                                                                                                                                                                               |
| CHU de Lille, Lille France                                                                                                     | Saad Nseir                      | Sébastien Préau, Raphaël Favory<br>Alexandre Pierre                                                                                                                                                                               |
| CH Mont-de-Marsan, Mont-de-Marsan, France                                                                                      | Arnaud Sement                   |                                                                                                                                                                                                                                   |
| CHU Grenoble Alpes, Grenoble, France                                                                                           | Nicolas Terzi                   | Florian Sigaud, Clara Candille, Emanuele Turbil                                                                                                                                                                                   |

|                                                          |                       |                                                                            |
|----------------------------------------------------------|-----------------------|----------------------------------------------------------------------------|
|                                                          |                       |                                                                            |
| Amiens university hospital, Amiens, France               | Julien Maizel         | Clément Brault, Yoan Zerbib                                                |
| CHU de Caen, Caen, France                                | Aurélie Joret         | Cédric Daubin                                                              |
| Centre hospitalier intercommunal Aix-Pertuis             | Laurent Lefebvre      | Alais Giraud                                                               |
| CH de Dax, Dax, France                                   | Adrien Auvet          |                                                                            |
| CH Béthune, Béthune, France                              | Christophe Vinsonneau | Mehdi Marzouk                                                              |
| CHU Dijon-Bourgogne, Dijon, France                       | Jean-Pierre Quenot    | Pascal Andreu, Marie Labruyère,<br>Jean-Baptiste Roudaut<br>François Aptel |
| CHU Bordeaux, Bordeaux, France                           | Alexandre Boyer       | Philippe Boyer                                                             |
| CHD Vendée, La Roche sur Yon, France                     | Jean-Claude Lacherade | Hugo Hille                                                                 |
| CH Valence, Valence, France                              | Marie Bouteloup       | Mathieu Jeannot                                                            |
| CH Blois, Blois, France                                  | Marc Feller           |                                                                            |
| CH Lorient, Lorient, France                              | Guillaume Grillet     |                                                                            |
| Hôpital Brabois, CHU Nancy, Vandoeuvre les Nancy, France | Bruno Levy            | Antoine Kimmoun                                                            |

**Table S1. Inclusion and exclusion criteria in each trial**

|                           | Mexico                                                                                                                                                                                                                                                                                                                      | USA and Canada                                                                                                                                                                                                                                                                                                                                                                                                                                                                                                                                                                                                                                                                                            | Ireland                                                                                                                                                                                                                                                                                                                 | France and Spain                                                                                                                                                                                                                                                                                                                                                                                                                                                                                                                                                                                                                                   |
|---------------------------|-----------------------------------------------------------------------------------------------------------------------------------------------------------------------------------------------------------------------------------------------------------------------------------------------------------------------------|-----------------------------------------------------------------------------------------------------------------------------------------------------------------------------------------------------------------------------------------------------------------------------------------------------------------------------------------------------------------------------------------------------------------------------------------------------------------------------------------------------------------------------------------------------------------------------------------------------------------------------------------------------------------------------------------------------------|-------------------------------------------------------------------------------------------------------------------------------------------------------------------------------------------------------------------------------------------------------------------------------------------------------------------------|----------------------------------------------------------------------------------------------------------------------------------------------------------------------------------------------------------------------------------------------------------------------------------------------------------------------------------------------------------------------------------------------------------------------------------------------------------------------------------------------------------------------------------------------------------------------------------------------------------------------------------------------------|
| <b>Inclusion criteria</b> | <p>1) Adult patients (18 y) with RT-PCR-confirmed Covid-19 and respiratory distress (regardless of Berlin criteria for ARDS).</p> <p>2) Requirement of a <math>F_iO_2 \geq 30\%</math> through high-flow nasal cannula (HFNC) to maintain a capillary <math>S_pO_2 \geq 90\%</math>.</p> <p>3) Written informed consent</p> | <p>1) Covid-19 pneumonia based on the center for disease control guidelines</p> <p>2) Presence of acute hypoxemic respiratory failure;</p> <p>3) Acute onset within 7 days of insult, or new (within 7 days) or worsening respiratory symptoms;</p> <p>4) Bilateral opacities on chest x-ray or computer tomographic scanner not fully explained by effusions, lobar or lung collapse, or nodules;</p> <p>5) Cardiac failure not the primary cause of acute respiratory failure</p> <p>6) Written informed consent</p> <p>7) <math>P_aO_2 / F_iO_2</math> ratio <math>&lt; 200</math> mmHg or <math>S_pO_2 / F_iO_2 &lt; 240</math> with HFNC at 50 L/min and <math>SpO_2</math> maintained at 92-95%</p> | <p>1) Suspected or confirmed Covid-19 infection</p> <p>2) Bilateral Infiltrates on chest X-ray</p> <p><math>S_pO_2 &lt; 94\%</math> on <math>F_iO_2 40\%</math> by either venturi facemask or high flow nasal cannula</p> <p>3) Respiratory rate <math>&lt; 40</math> breath/min</p> <p>4) Written informed consent</p> | <p>1) Adult patient suffering from Covid-19 pneumonia according to the diagnostic criteria in effect at the time of inclusion or very strongly suspected.</p> <p>2) Patient treated by nasal high flow therapy</p> <p>3) Moderate or severe ARDS: bilateral radiological opacities not explained entirely by effusions, atelectasis or nodules; acute hypoxemia with worsening within the 7 previous days, not entirely explained by left ventricular failure; <math>P_aO_2 / F_iO_2</math> ratio <math>&lt; 300</math> mmHg (or equivalent <math>S_pO_2 / F_iO_2</math>).</p> <p>4) Written informed consent in France, oral consent in Spain</p> |

|                                  |                                                                                                                                                                                                                                                                                                                                                                                                                                                                                                                                                                                                                      |                                                                                                                                                                                                                                                                                                                                                                                                                                                                                                                                                                                                                                                                                                                                                                                                                                                                                                                                                                                                                                                                                                                                                                                                                                                                          |                                                                                                                                                                                                                                                                                                                                                                                                                                                                                                                                         |                                                                                                                                                                                                                                                                                                                                                                                                                                                                                                                                   |
|----------------------------------|----------------------------------------------------------------------------------------------------------------------------------------------------------------------------------------------------------------------------------------------------------------------------------------------------------------------------------------------------------------------------------------------------------------------------------------------------------------------------------------------------------------------------------------------------------------------------------------------------------------------|--------------------------------------------------------------------------------------------------------------------------------------------------------------------------------------------------------------------------------------------------------------------------------------------------------------------------------------------------------------------------------------------------------------------------------------------------------------------------------------------------------------------------------------------------------------------------------------------------------------------------------------------------------------------------------------------------------------------------------------------------------------------------------------------------------------------------------------------------------------------------------------------------------------------------------------------------------------------------------------------------------------------------------------------------------------------------------------------------------------------------------------------------------------------------------------------------------------------------------------------------------------------------|-----------------------------------------------------------------------------------------------------------------------------------------------------------------------------------------------------------------------------------------------------------------------------------------------------------------------------------------------------------------------------------------------------------------------------------------------------------------------------------------------------------------------------------------|-----------------------------------------------------------------------------------------------------------------------------------------------------------------------------------------------------------------------------------------------------------------------------------------------------------------------------------------------------------------------------------------------------------------------------------------------------------------------------------------------------------------------------------|
| <p><b>Exclusion criteria</b></p> | <ol style="list-style-type: none"> <li>1) Age &lt;18 y</li> <li>2) Pregnancy</li> <li>3) Patients with immediate need of mechanical ventilation (altered mental status, signs of respiratory fatigue)</li> <li>4) Any vasopressor requirement to maintain a median arterial pressure <math>\geq 65</math> mmHg</li> <li>5) Contraindications for APP: recent abdominal or thoracic surgery/trauma, facial/pelvic/spine fractures, untreated pneumothorax)</li> <li>6) Do not resuscitate or do not intubate order</li> <li>7) Refusal or disability (uncooperative) of the patient to enroll in the study</li> </ol> | <ol style="list-style-type: none"> <li>1) Patients with a consistent <math>SpO_2 &lt; 80\%</math> when evaluated with a <math>FiO_2</math> of 0-6, or signs of respiratory fatigue (respiratory rate <math>&gt; 40</math>/min, <math>PaCO_2 &gt; 50</math> mmHg / <math>pH &lt; 7.30</math>, and obvious accessory respiratory muscle use);</li> <li>2) Immediate need for intubation (<math>PaO_2/FiO_2 &lt; 50</math> mmHg or <math>SpO_2/FiO_2 &lt; 90</math>, unable to protect airway or mental status change);</li> <li>3) Hemodynamic instability (sustained systolic blood pressure <math>&lt; 90</math> mmHg, sustained mean blood pressure below 65 mmHg or requirement for vasopressor);</li> <li>4) Unable to collaborate with HFNC/APP with agitation or refusal of HFNC/APP.</li> <li>5) Chest trauma or any contraindication for APP</li> <li>6) Pneumothorax</li> <li>7) Age <math>&lt; 18</math> years</li> <li>8) Pregnant</li> <li>9) Body mass index <math>&gt; 40</math> kg/m<sup>2</sup></li> <li>10) Unable to communicate</li> <li>11) Patient self-proned for more than 1 hr</li> <li>12) Patient with moderate or severe ILD</li> <li>13) Patient with stage IV lung cancer</li> <li>14) Patient requiring long term oxygen therapy</li> </ol> | <ol style="list-style-type: none"> <li>1) Age <math>&lt; 18</math></li> <li>2) Uncooperative or likely to be unable to lie on abdomen for 16 hours</li> <li>3) Vomiting or bowel obstruction</li> <li>4) Palliative care</li> <li>5) Multiorgan failure</li> <li>6) Standard contraindications to APP including the presence of an open abdominal wound, unstable pelvic fracture, spinal lesions and instability, pregnancy <math>&gt; 20/40</math> gestation and brain injury without monitoring of intracranial pressure.</li> </ol> | <ol style="list-style-type: none"> <li>1) Indication for immediate tracheal intubation</li> <li>2) Significant acute progressive circulatory insufficiency</li> <li>3) Impaired consciousness, confusion, restlessness</li> <li>4) Body mass index <math>&gt; 40</math> kg / m<sup>2</sup></li> <li>5) Chest trauma or other contraindication to APP</li> <li>6) Pneumothorax</li> <li>7) Vulnerable person: safeguard of justice, curatorship or tutorship known at inclusion</li> <li>8) Pregnant or lactating woman</li> </ol> |
|----------------------------------|----------------------------------------------------------------------------------------------------------------------------------------------------------------------------------------------------------------------------------------------------------------------------------------------------------------------------------------------------------------------------------------------------------------------------------------------------------------------------------------------------------------------------------------------------------------------------------------------------------------------|--------------------------------------------------------------------------------------------------------------------------------------------------------------------------------------------------------------------------------------------------------------------------------------------------------------------------------------------------------------------------------------------------------------------------------------------------------------------------------------------------------------------------------------------------------------------------------------------------------------------------------------------------------------------------------------------------------------------------------------------------------------------------------------------------------------------------------------------------------------------------------------------------------------------------------------------------------------------------------------------------------------------------------------------------------------------------------------------------------------------------------------------------------------------------------------------------------------------------------------------------------------------------|-----------------------------------------------------------------------------------------------------------------------------------------------------------------------------------------------------------------------------------------------------------------------------------------------------------------------------------------------------------------------------------------------------------------------------------------------------------------------------------------------------------------------------------------|-----------------------------------------------------------------------------------------------------------------------------------------------------------------------------------------------------------------------------------------------------------------------------------------------------------------------------------------------------------------------------------------------------------------------------------------------------------------------------------------------------------------------------------|

HFNC denotes high-flow nasal cannula, APP a wake prone positioning,  $SpO_2$  denotes peripheral blood oxygen saturation,  $PaO_2$ , partial pressure of oxygen,  $FiO_2$  Fraction of inspired oxygen.

**Table S2. Standard management in each trial**

| Mexico                                                                                                                                                                                                                                                                                                                                                                                           | USA and Canada                                                                                                                                                                                                                                                                                                                                                                                                | Ireland                                                  | France and Spain                                                                                                                                                                                                                                                                                                                                                                                                                                                                                              |
|--------------------------------------------------------------------------------------------------------------------------------------------------------------------------------------------------------------------------------------------------------------------------------------------------------------------------------------------------------------------------------------------------|---------------------------------------------------------------------------------------------------------------------------------------------------------------------------------------------------------------------------------------------------------------------------------------------------------------------------------------------------------------------------------------------------------------|----------------------------------------------------------|---------------------------------------------------------------------------------------------------------------------------------------------------------------------------------------------------------------------------------------------------------------------------------------------------------------------------------------------------------------------------------------------------------------------------------------------------------------------------------------------------------------|
| <p>HFNC will be initiated at 40 L/min at 37°C according to patient comfort and tolerance (Vapotherm, Precision Flow, Exeter, New Hampshire), with FiO<sub>2</sub> titrated to a capillary S<sub>p</sub>O<sub>2</sub> of 92% to 95%. HFNC will be withdrawn when FiO<sub>2</sub> is ≤40%. Staff intensivists will continuously monitor vital signs and adherence to protocol on a 24/7 basis.</p> | <p>HFNC will be initiated at 50 L/min (AIRVO2 or Optiflow, Fisher &amp; Paykel Health care Limited., Auckland, New Zealand) with temperature set at 37°C. Nasal cannula size will be determined by the patient's nostril size (≤ 50%). FiO<sub>2</sub> will be adjusted to maintain SpO<sub>2</sub> at 92% to 95%. Flow and temperature will be adjusted based on patient's comfort and clinical response</p> | <p>Control patients will receive full standard care.</p> | <p>HFNC adapted for an S<sub>p</sub>O<sub>2</sub> of 90-95%. Except in case of poor tolerance by the patient a minimum gas flow rate of 50 L/min will be set initially. Weaning of the HFNC will first be performed reducing FiO<sub>2</sub> down to 0.4 before reducing the gas flow rate. In clinically stable patients with a FiO<sub>2</sub> less than or equal to 0.4 and a gas flow rate less than or equal to 30 L/min, an attempt will be made to switch to standard oxygen therapy at 4-6 L/min.</p> |

SpO<sub>2</sub> denotes peripheral blood oxygen saturation, FiO<sub>2</sub> Fraction of inspired oxygen.



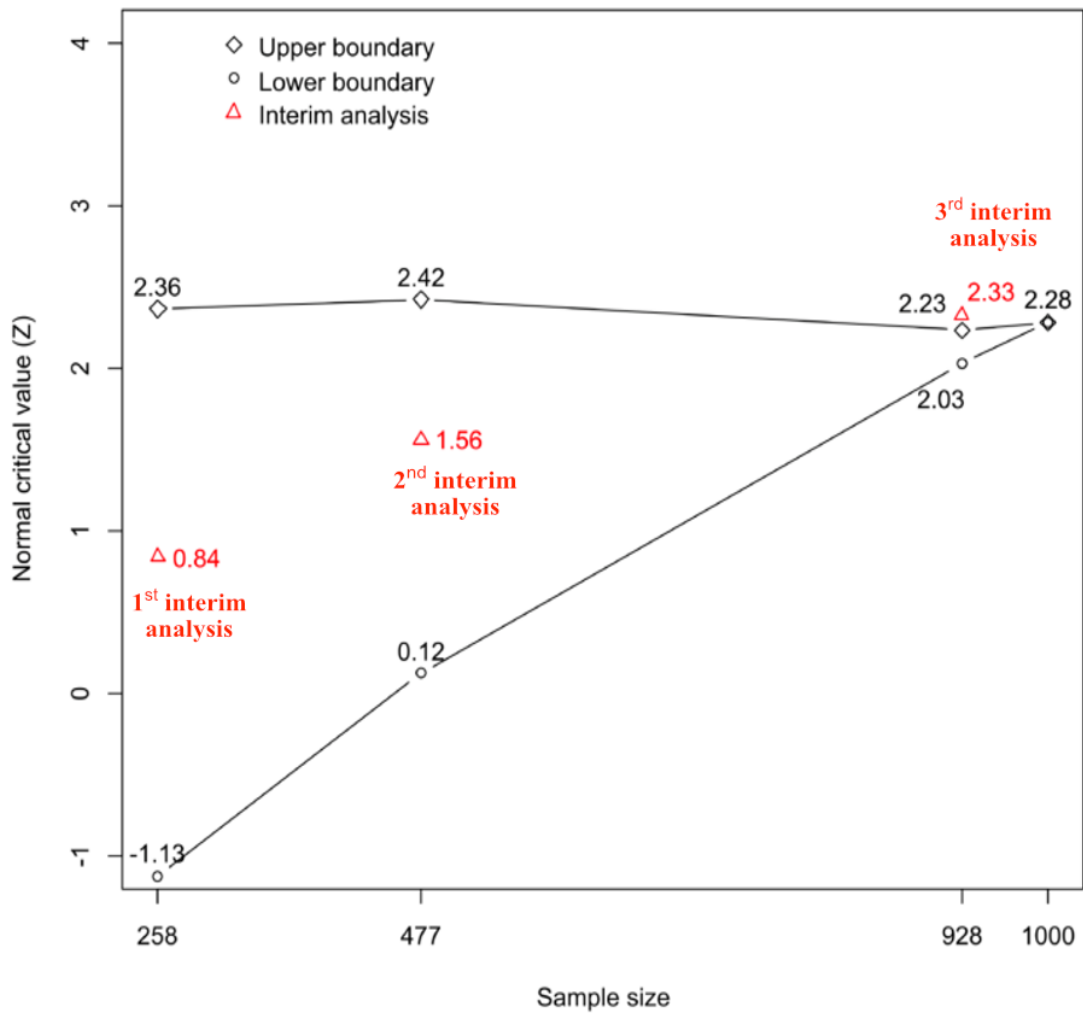

**Figure S1. Z statistic for the three interim analyses**

The changing pace of the pandemic dynamics made planning and executions of interim analysis very challenging. The meta-trial experienced a sudden surge of inclusions in the last months of 2020 while preparing the second interim analysis (planned at 400 patients). By the time the results were available in December (which recommended to continue recruitment), 800 patients had already been included, thus the steering committee decided not to perform the third interim analysis (planned at 600 patients) and move directly to the fourth interim analysis (800 patients). In the short time required to make this decision, 928 patients had been included in the interim analysis which ended up with the decision to stop recruitment. At the time of recruitment interruption, 1126 patients had been included.

**Table S3. Repeated confidence intervals of the primary outcome**

| Analysis | Awake prone positioning | Standard care   | Difference of proportions | Confidence interval |
|----------|-------------------------|-----------------|---------------------------|---------------------|
| 1        | 35% (46/131)            | 40% (51/127)    | -5·0%                     | [-19·3%;9·4%]       |
| 2        | 35% (84/238)            | 42 % (101/239)  | -7·0%                     | [-17·8%;4·0%]       |
| 3        | 40% (184/463)           | 47% (220/465)   | -7·6%                     | [-14·9%;-0·2%]      |
| 4        | 39·5% (223/564)         | 46·1% (257/557) | -6·6%                     | [-13·2%;0%]         |

As multiple looks at the data affects the construction of confidence intervals just as it affects significance levels of hypothesis tests the sequence of confidence intervals, using the Miettinen and Nurminen method <https://pubmed.ncbi.nlm.nih.gov/4023479/> on the nominal alpha-level of the upper bound, corresponding to the interim and final analyses. Using this method assures a confidence level of 95% for the 4 confidence intervals simultaneously.

**Table S4. American trial**

| Variable                                                                       | MD | Standard care<br>(n = 110) | MD | APP<br>(n = 112) |
|--------------------------------------------------------------------------------|----|----------------------------|----|------------------|
| Age, mean ± sd                                                                 | 0  | 62.5 ± 13.3                | 0  | 62.2 ± 12.5      |
| Female sex — no. (%)                                                           | 0  | 42 (38%)                   | 0  | 40 (36%)         |
| Body mass index, mean ± sd †                                                   | 0  | 30.5 ± 5.3                 | 0  | 30.0 ± 5.1       |
| Number of days from admission in hospital to enrolment in study, med [Q1 ; Q3] |    | 0.8 [0.3;1.8]              |    | 0.8 [0.3;1.8]    |
| Respiratory rate at enrolment, mean ± sd                                       | 0  | 26.1 ± 7.4                 | 0  | 25.3 ± 6.1       |
| Mean arterial pressure at enrolment, mean ± sd                                 | 4  | 91.7 ± 11.1                | 7  | 91.2 ± 13.0      |
| SpO <sub>2</sub> :FiO <sub>2</sub> ratio at enrolment, mean ± sd               | 0  | 156.0 ± 40.6               | 0  | 152.0 ± 37.8     |
| Coexisting illness— no. (%) ‡                                                  |    |                            |    |                  |
| Chronic heart disease — no. (%)                                                | 0  | 41 (37%)                   | 0  | 25 (22%)         |
| Chronic lung disease — no. (%)                                                 | 0  | 21 (19%)                   | 0  | 11 (10%)         |
| Chronic kidney disease — no. (%)                                               | 0  | 8 (7%)                     | 0  | 11 (10%)         |
| Severe liver disease — no. (%)                                                 | 0  | 2 (2%)                     | 0  | 1 (1%)           |
| Diabetes mellitus (type I and II) — no. (%)                                    | 0  | 51 (46%)                   | 0  | 49 (44%)         |
| Obesity — no. (%)                                                              | 0  | 61 (56%)                   | 0  | 59 (53%)         |
| Active malignancy — no. (%)                                                    | 0  | 6 (6%)                     | 0  | 8 (7%)           |
| Use of glucocorticoids for treatment of Covid-19 — no. (%)                     | 0  | 88 (80%)                   | 0  | 80 (71%)         |
| Do-not-intubate — no. (%)                                                      | 0  | 15 (14%)                   | 0  | 7 (6%)           |
| Highest treating location — no. (%)                                            |    |                            |    |                  |
| General ward                                                                   | 0  | 14 (13%)                   | 0  | 20 (18%)         |
| Intermediate care unit                                                         | 0  | 0 (0%)                     | 0  | 1 (1%)           |
| Intensive care unit                                                            | 0  | 96 (87%)                   | 0  | 91 (81%)         |

SpO<sub>2</sub> denotes peripheral blood oxygen saturation, FiO<sub>2</sub> Fraction of inspired oxygen, MD missing data.

† The body-mass index is the weight in kilograms divided by the square of the height in meters.

‡ Coexisting illnesses were defined as follows: chronic heart disease — heart failure or coronary artery disease or hypertension; chronic lung disease — obstructive or restrictive lung disease; chronic kidney disease — estimated glomerular filtration rate < 60 mL/min/1.73 m<sup>2</sup> prior to hospital admission; severe liver disease — cirrhosis and/or portal hypertension with history of variceal bleeding, or liver disease with Child-Pugh score ≥ 10; obesity — body-mass index ≥ 30 kg/m<sup>2</sup>.

**Table S5. Canadian trial**

| Variable                                                                       | MD | Standard care<br>(n = 6) | MD | APP<br>(n = 7) |
|--------------------------------------------------------------------------------|----|--------------------------|----|----------------|
| Age, mean ± sd                                                                 | 0  | 68.3 ± 20.5              | 0  | 65.1 ± 15.6    |
| Female sex — no. (%)                                                           | 0  | 2 (33%)                  | 0  | 4 (57%)        |
| Body mass index, mean ± sd †                                                   | 2  | 30.7 ± 6.5               | 1  | 27.4 ± 3.6     |
| Number of days from admission in hospital to enrolment in study, med [Q1 ; Q3] |    | 0.2 [0; 0.4]             |    | 0.0 [0; 0.2]   |
| Respiratory rate at enrolment, mean ± sd                                       | 0  | 28.2 ± 2.2               | 0  | 29.0 ± 1.9     |
| Mean arterial pressure at enrolment, mean ± sd                                 | 0  | 88.2 ± 10.0              | 0  | 89.9 ± 8.0     |
| SpO <sub>2</sub> :FiO <sub>2</sub> ratio at enrolment, mean ± sd               | 0  | 166.8 ± 86.5             | 0  | 169.3 ± 68.1   |
| Coexisting illness — no. (%) ‡                                                 |    |                          |    |                |
| Chronic heart disease — no. (%)                                                | 0  | 3 (50%)                  | 0  | 3 (43%)        |
| Chronic lung disease — no. (%)                                                 | 0  | 1 (17%)                  | 0  | 2 (29%)        |
| Chronic kidney disease — no. (%)                                               | 0  | 2 (33%)                  | 0  | 0 (0%)         |
| Severe liver disease — no. (%)                                                 | 0  | 0 (0%)                   | 0  | 0 (0%)         |
| Diabetes mellitus (type I and II) — no. (%)                                    | 0  | 2 (33%)                  | 0  | 5 (71%)        |
| Obesity — no. (%)                                                              | 2  | 2 (50%)                  | 1  | 1 (17%)        |
| Active malignancy — no. (%)                                                    | 0  | 0 (0%)                   | 0  | 0 (0%)         |
| Use of glucocorticoids for treatment of Covid-19 — no. (%)                     | 0  | 4 (67%)                  | 0  | 6 (86%)        |
| Do-not-intubate — no. (%)                                                      | 0  | 3 (50%)                  | 0  | 3 (43%)        |
| Highest treating location — no. (%)                                            |    |                          |    |                |
| General ward                                                                   | 0  | 3 (50%)                  | 0  | 2 (29%)        |
| Intermediate care unit                                                         | 0  | 0 (0%)                   | 0  | 3 (43%)        |
| Intensive care unit                                                            | 0  | 3 (50%)                  | 0  | 2 (29%)        |

SpO<sub>2</sub> denotes peripheral blood oxygen saturation, FiO<sub>2</sub> Fraction of inspired oxygen, MD missing data.

† The body-mass index is the weight in kilograms divided by the square of the height in meters.

‡ Coexisting illnesses were defined as follows: chronic heart disease — heart failure or coronary artery disease or hypertension; chronic lung disease — obstructive or restrictive lung disease; chronic kidney disease — estimated glomerular filtration rate < 60 mL/min/1.73 m<sup>2</sup> prior to hospital admission; severe liver disease — cirrhosis and/or portal hypertension with history of variceal bleeding, or liver disease with Child-Pugh score ≥ 10; obesity — body-mass index ≥ 30 kg/m<sup>2</sup>.

**Table S6. French trial**

| Variable                                                                       | MD | Standard care<br>(n = 202) | MD | APP<br>(n = 200) |
|--------------------------------------------------------------------------------|----|----------------------------|----|------------------|
| Age, mean ± sd                                                                 | 1  | 62.9 ± 11.5                | 0  | 64.2 ± 10.2      |
| Female sex — no. (%)                                                           | 0  | 51 (25%)                   | 0  | 49 (25%)         |
| Body mass index, mean ± sd †                                                   | 0  | 28.9 ± 4.4                 | 1  | 28.7 ± 4.1       |
| Number of days from admission in hospital to enrolment in study, med [Q1 ; Q3] |    | 1.0 [1.0; 3.0]             |    | 2.0 [1.0; 3.0]   |
| Respiratory rate at enrolment, mean ± sd                                       | 0  | 23.8 ± 5.5                 | 1  | 24.2 ± 5.2       |
| Mean arterial pressure at enrolment, mean ± sd                                 | 2  | 90.2 ± 13.0                | 0  | 91.6 ± 13.4      |
| SpO <sub>2</sub> :FiO <sub>2</sub> ratio at enrolment, mean ± sd               | 0  | 155.8 ± 44.6               | 0  | 155.2 ± 48.3     |
| Coexisting illness — no. (%‡)                                                  |    |                            |    |                  |
| Chronic heart disease — no. (%)                                                | 0  | 11 (5%)                    | 0  | 22 (11%)         |
| Chronic lung disease — no. (%)                                                 | 0  | 28 (14%)                   | 0  | 28 (14%)         |
| Chronic kidney disease — no. (%)                                               | 0  | 5 (3%)                     | 0  | 7 (4%)           |
| Severe liver disease — no. (%)                                                 | 0  | 1 (1%)                     | 0  | 3 (2%)           |
| Diabetes mellitus (type I and II) — no. (%)                                    | 0  | 50 (25%)                   | 0  | 50 (25%)         |
| Obesity — no. (%)                                                              | 0  | 74 (37%)                   | 1  | 61 (31%)         |
| Active malignancy — no. (%)                                                    | 0  | 22 (11%)                   | 0  | 33 (17%)         |
| Use of glucocorticoids for treatment of Covid-19 — no. (%)                     | 0  | 193 (96%)                  | 0  | 199 (100%)       |
| Do-not-intubate — no. (%)                                                      | 0  | 6 (3%)                     | 0  | 9 (5%)           |
| Highest treating location — no. (%)                                            |    |                            |    |                  |
| General ward                                                                   | 0  | 0 (0%)                     | 0  | 0 (0%)           |
| Intermediate care unit                                                         | 0  | 0 (0%)                     | 0  | 0 (0%)           |
| Intensive care unit                                                            | 0  | 202 (100%)                 | 0  | 200 (100%)       |

SpO<sub>2</sub> denotes peripheral blood oxygen saturation, FiO<sub>2</sub> Fraction of inspired oxygen, MD missing data.

† The body-mass index is the weight in kilograms divided by the square of the height in meters.

‡ Coexisting illnesses were defined as follows: chronic heart disease — heart failure or coronary artery disease or hypertension; chronic lung disease — obstructive or restrictive lung disease; chronic kidney disease — estimated glomerular filtration rate < 60 mL/min/1.73 m<sup>2</sup> prior to hospital admission; severe liver disease — cirrhosis and/or portal hypertension with history of variceal bleeding, or liver disease with Child -Pugh score ≥ 10; obesity — body-mass index ≥ 30 kg/m<sup>2</sup>.

**Table S7. Irish trial**

| Variable                                                                       | MD | Standard care<br>(n = 12) | MD | APP<br>(n = 12) |
|--------------------------------------------------------------------------------|----|---------------------------|----|-----------------|
| Age, mean ± sd                                                                 | 0  | 59.3 ± 16.0               | 0  | 62.8 ± 11.0     |
| Female sex — no. (%)                                                           | 0  | 5 (42%)                   | 0  | 3 (25%)         |
| Body mass index, mean ± sd †                                                   | 0  | 34.2 ± 7.9                | 0  | 32.2 ± 7.1      |
| Number of days from admission in hospital to enrolment in study, med [Q1 ; Q3] |    | 1.0 [1.0; 1.8]            |    | 1.0 [1.0; 2.5]  |
| Respiratory rate at enrolment, mean ± sd                                       | 0  | 25.8 ± 6.3                | 0  | 23.8 ± 4.6      |
| Mean arterial pressure at enrolment, mean ± sd                                 | 0  | 90.2 ± 11.7               | 0  | 94.9 ± 9.3      |
| SpO <sub>2</sub> :FiO <sub>2</sub> ratio at enrolment, mean ± sd               | 0  | 178.3 ± 52.7              | 0  | 193.9 ± 45.5    |
| Coexisting illness— no. (%)‡                                                   |    |                           |    |                 |
| Chronic heart disease — no. (%)                                                | 0  | 4 (33%)                   | 0  | 7 (58%)         |
| Chronic lung disease — no. (%)                                                 | 0  | 4 (33%)                   | 0  | 2 (17%)         |
| Chronic kidney disease — no. (%)                                               | 0  | 0 (0%)                    | 0  | 0 (0%)          |
| Severe liver disease — no. (%)                                                 | 0  | 0 (0%)                    | 0  | 0 (0%)          |
| Diabetes mellitus (type I and II) — no. (%)                                    | 0  | 0 (0%)                    | 0  | 3 (25%)         |
| Obesity — no. (%)                                                              | 0  | 8 (67%)                   | 0  | 6 (50%)         |
| Active malignancy — no. (%)                                                    | 0  | 1 (8%)                    | 0  | 1 (8%)          |
| Use of glucocorticoids for treatment of Covid-19 — no. (%)                     | 0  | 11 (92%)                  | 0  | 12 (100%)       |
| Do-not-intubate — no. (%)                                                      | 0  | 0 (0%)                    | 0  | 2 (17%)         |
| Highest treating location — no. (%)                                            |    |                           |    |                 |
| General ward                                                                   | 0  | 0 (0%)                    | 0  | 0 (0%)          |
| Intermediate care unit                                                         | 0  | 4 (33%)                   | 0  | 8 (67%)         |
| Intensive care unit                                                            | 0  | 8 (67%)                   | 0  | 4 (33%)         |

SpO<sub>2</sub> denotes peripheral blood oxygen saturation, FiO<sub>2</sub> Fraction of inspired oxygen, MD missing data.

† The body-mass index is the weight in kilograms divided by the square of the height in meters.

‡ Coexisting illnesses were defined as follows: chronic heart disease — heart failure or coronary artery disease or hypertension; chronic lung disease — obstructive or restrictive lung disease; chronic kidney disease — estimated glomerular filtration rate < 60 mL/min/1.73 m<sup>2</sup> prior to hospital admission; severe liver disease — cirrhosis and/or portal hypertension with history of variceal bleeding, or liver disease with Child-Pugh score ≥ 10; obesity — body-mass index ≥ 30 kg/m<sup>2</sup>.

**Table S8. Mexican trial**

| Variable                                                                       | MD | Standard care<br>(n = 214) | MD | APP<br>(n = 216) |
|--------------------------------------------------------------------------------|----|----------------------------|----|------------------|
| Age, mean ± sd                                                                 | 0  | 58.2 ± 15.8                | 0  | 58.6 ± 15.8      |
| Female sex — no. (%)                                                           | 0  | 88 (41%)                   | 0  | 84 (39%)         |
| Body mass index, mean ± sd †                                                   | 0  | 30.0 ± 3.8                 | 0  | 30.3 ± 4.6       |
| Number of days from admission in hospital to enrolment in study, med [Q1 ; Q3] |    | 0.6 [0.4; 1.0]             |    | 0.7 [0.4; 1.0]   |
| Respiratory rate at enrolment, mean ± sd                                       | 0  | 25.3 ± 4.2                 | 0  | 25.0 ± 4.3       |
| Mean arterial pressure at enrolment, mean ± sd                                 | 0  | 82.6 ± 7.4                 | 0  | 82.7 ± 7.3       |
| SpO <sub>2</sub> :F <sub>i</sub> O <sub>2</sub> ratio at enrolment, mean ± sd  | 0  | 135.5 ± 37.9               | 0  | 134.7 ± 38.7     |
| Coexisting illness— no. (%)‡                                                   |    |                            |    |                  |
| Chronic heart disease — no. (%)                                                | 0  | 67 (31%)                   | 0  | 62 (29%)         |
| Chronic lung disease — no. (%)                                                 | 0  | 10 (5%)                    | 0  | 18 (8%)          |
| Chronic kidney disease — no. (%)                                               | 0  | 19 (9%)                    | 0  | 24 (11%)         |
| Severe liver disease — no. (%)                                                 | 0  | 3 (1%)                     | 0  | 4 (2%)           |
| Diabetes mellitus (type I and II) — no. (%)                                    | 0  | 68 (32%)                   | 0  | 64 (30%)         |
| Obesity — no. (%)                                                              | 0  | 81 (38%)                   | 0  | 86 (40%)         |
| Active malignancy — no. (%)                                                    | 0  | 2 (1%)                     | 0  | 3 (1%)           |
| Use of glucocorticoids for treatment of Covid-19 — no. (%)                     | 0  | 184 (86%)                  | 0  | 182 (84%)        |
| Do-not-intubate — no. (%)                                                      | 0  | 20 (9%)                    | 0  | 23 (11%)         |
| Highest treating location — no. (%)                                            |    |                            |    |                  |
| General ward                                                                   | 0  | 0 (0%)                     | 0  | 0 (0%)           |
| Intermediate care unit                                                         | 0  | 162 (76%)                  | 0  | 172 (80%)        |
| Intensive care unit                                                            | 0  | 52 (24%)                   | 0  | 44 (20%)         |

SpO<sub>2</sub> denotes peripheral blood oxygen saturation, FiO<sub>2</sub> Fraction of inspired oxygen, MD missing data.

† The body-mass index is the weight in kilograms divided by the square of the height in meters.

‡ Coexisting illnesses were defined as follows: chronic heart disease — heart failure or coronary artery disease or hypertension; chronic lung disease — obstructive or restrictive lung disease; chronic kidney disease — estimated glomerular filtration rate < 60 mL/min/1.73 m<sup>2</sup> prior to hospital admission; severe liver disease — cirrhosis and/or portal hypertension with history of variceal bleeding, or liver disease with Child-Pugh score ≥ 10; obesity — body-mass index ≥ 30 kg/m<sup>2</sup>.

**Table S9. Spanish trial**

| Variable                                                                       | MD | Standard care<br>(n = 13) | MD | APP<br>(n = 17) |
|--------------------------------------------------------------------------------|----|---------------------------|----|-----------------|
| Age, mean ± sd                                                                 | 0  | 52.4 ± 11.5               | 0  | 58.1 ± 9.9      |
| Female sex — no. (%)                                                           | 0  | 3 (23%)                   | 0  | 4 (24%)         |
| Body mass index, mean ± sd †                                                   | 0  | 28.9 ± 4.9                | 0  | 30.1 ± 3.2      |
| Number of days from admission in hospital to enrolment in study, med [Q1 ; Q3] |    | 1.0 [0; 4.0]              |    | 2.0 [1.0;4.0]   |
| Respiratory rate at enrolment, mean ± sd                                       | 0  | 20.8 ± 3.8                | 0  | 21.4 ± 4.9      |
| Mean arterial pressure at enrolment, mean ± sd                                 | 0  | 85.4 ± 14.2               | 0  | 93.2 ± 17.9     |
| SpO <sub>2</sub> :FiO <sub>2</sub> ratio at enrolment, mean ± sd               | 0  | 155.8 ± 30.7              | 0  | 162.9 ± 22.8    |
| Coexisting illness— no. (%)‡                                                   |    |                           |    |                 |
| Chronic heart disease — no. (%)                                                | 0  | 1 (8%)                    | 0  | 1 (6%)          |
| Chronic lung disease — no. (%)                                                 | 0  | 0 (0%)                    | 0  | 2 (12%)         |
| Chronic kidney disease — no. (%)                                               | 0  | 1 (8%)                    | 0  | 3 (18%)         |
| Severe liver disease — no. (%)                                                 | 0  | 0 (0%)                    | 0  | 0 (0%)          |
| Diabetes mellitus (type I and II) — no. (%)                                    | 0  | 2 (15%)                   | 0  | 5 (29%)         |
| Obesity — no. (%)                                                              | 0  | 5 (39%)                   | 0  | 8 (47%)         |
| Active malignancy — no. (%)                                                    | 0  | 0 (0%)                    | 0  | 0 (0%)          |
| Use of glucocorticoids for treatment of Covid-19 — no. (%)                     | 0  | 12 (92%)                  | 0  | 15 (88%)        |
| Do-not-intubate — no. (%)                                                      | 0  | 0 (0%)                    | 0  | 0 (0%)          |
| Highest treating location — no. (%)                                            |    |                           |    |                 |
| General ward                                                                   | 0  | 0 (0%)                    | 0  | 0 (0%)          |
| Intermediate care unit                                                         | 0  | 0 (0%)                    | 0  | 0 (0%)          |
| Intensive care unit                                                            | 0  | 13 (100%)                 | 0  | 17 (100%)       |

SpO<sub>2</sub> denotes peripheral blood oxygen saturation, FiO<sub>2</sub> Fraction of inspired oxygen, MD missing data.

† The body-mass index is the weight in kilograms divided by the square of the height in meters.

‡ Coexisting illnesses were defined as follows: chronic heart disease — heart failure or coronary artery disease or hypertension; chronic lung disease — obstructive or restrictive lung disease; chronic kidney disease — estimated glomerular filtration rate < 60 mL/min/1.73 m<sup>2</sup> prior to hospital admission; severe liver disease — cirrhosis and/or portal hypertension with history of variceal bleeding, or liver disease with Child -Pugh score ≥ 10; obesity — body-mass index ≥ 30 kg/m<sup>2</sup>.



### 3.4 Daily duration of time spent in prone positioning in individual trials

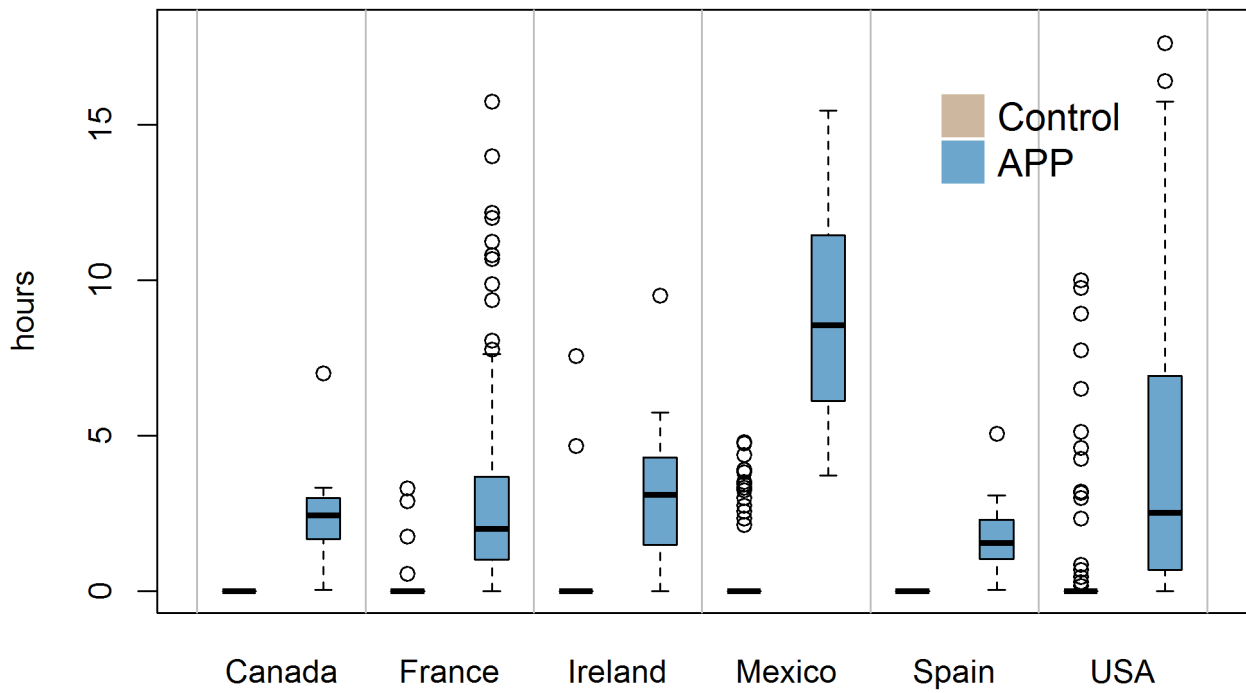

Figure S2: Boxplots durations of prone positioning (in hours per day from Day 0 to Day 14) in both groups

| Group         | Country    | min | max  | Mean $\pm$ sd | Median [Q1;Q3]  |
|---------------|------------|-----|------|---------------|-----------------|
| APP           | Canada     | 0-0 | 7-0  | 2.7 $\pm$ 2.2 | 2.4 [1.7; 3.0]  |
| APP           | France     | 0-0 | 15.8 | 2.9 $\pm$ 2.9 | 2.0 [1.0; 3.7]  |
| APP           | Ireland    | 0-0 | 9.5  | 3.3 $\pm$ 2.7 | 3.1 [2.1; 3.9]  |
| APP           | Mexico     | 3.7 | 15.5 | 9.0 $\pm$ 3.2 | 8.6 [6.1; 11.4] |
| APP           | Spain      | 0-0 | 5.1  | 1.7 $\pm$ 1.2 | 1.6 [1.1; 2.3]  |
| APP           | USA        | 0-0 | 19.2 | 4.4 $\pm$ 4.7 | 2.5 [0.7; 6.9]  |
| APP           | Meta-trial | 0-0 | 19.2 | 5.6 $\pm$ 4.4 | 5.0 [1.6; 8.8]  |
| Standard care | Canada     | 0-0 | 0-0  | 0 $\pm$ 0     | 0 [0;0]         |
| Standard care | France     | 0-0 | 3.3  | 0 $\pm$ 0.3   | 0 [0;0]         |
| Standard care | Ireland    | 0-0 | 7.6  | 1.0 $\pm$ 2.5 | 0 [0;0]         |
| Standard care | Mexico     | 0-0 | 4.8  | 0.3 $\pm$ 1.0 | 0 [0;0]         |
| Standard care | Spain      | 0-0 | 0-0  | 0 $\pm$ 0     | 0 [0;0]         |
| Standard care | USA        | 0-0 | 10.0 | 0.7 $\pm$ 2.0 | 0 [0;0]         |
| Standard care | Meta-trial | 0-0 | 10.0 | 0.3 $\pm$ 1.2 | 0 [0;0]         |

APP, awake prone positioning

Table S10: Description of the durations of prone positioning (in hours per day from Day 0 to Day 14) in individual trials

### 3.5 Investigation of heterogeneity between trials

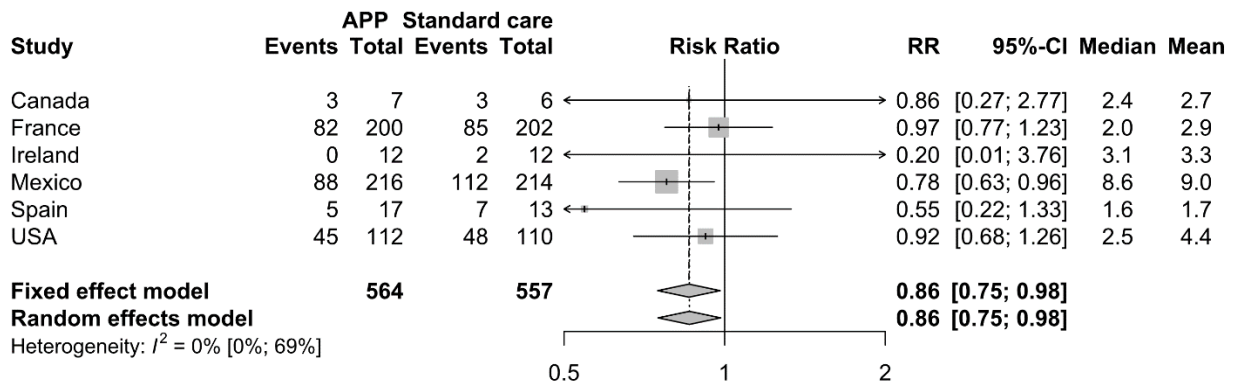

**Figure S3: Forest plot with mixed effects linear model with group as a fixed effect and country as a random effect on intubation or death (primary outcome) at Day 28. Median and mean durations of prone positioning sessions in hours**

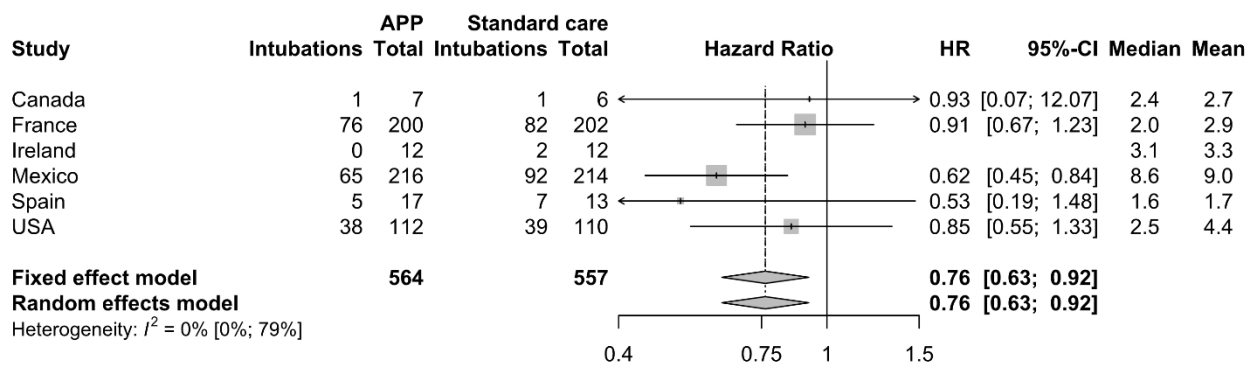

**Figure S4: Forest plot with mixed effects linear model with group as a fixed effect and country as a random effect on intubation at Day 28. Median and mean durations of prone positioning sessions in hours**

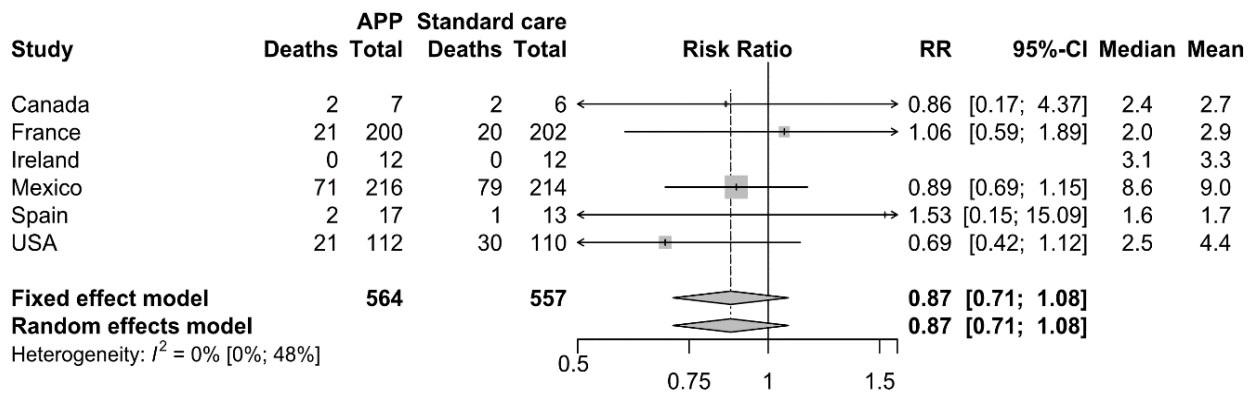

**Figure S5: Forest plot with mixed effects linear model with group as a fixed effect and country as a random effect on death at Day 28. Median and mean durations of prone positioning sessions in hours**

### 3.6 Interaction between subgroups according to severity ( $SpO_2/FiO_2 < 190$ vs $\geq 190$ )

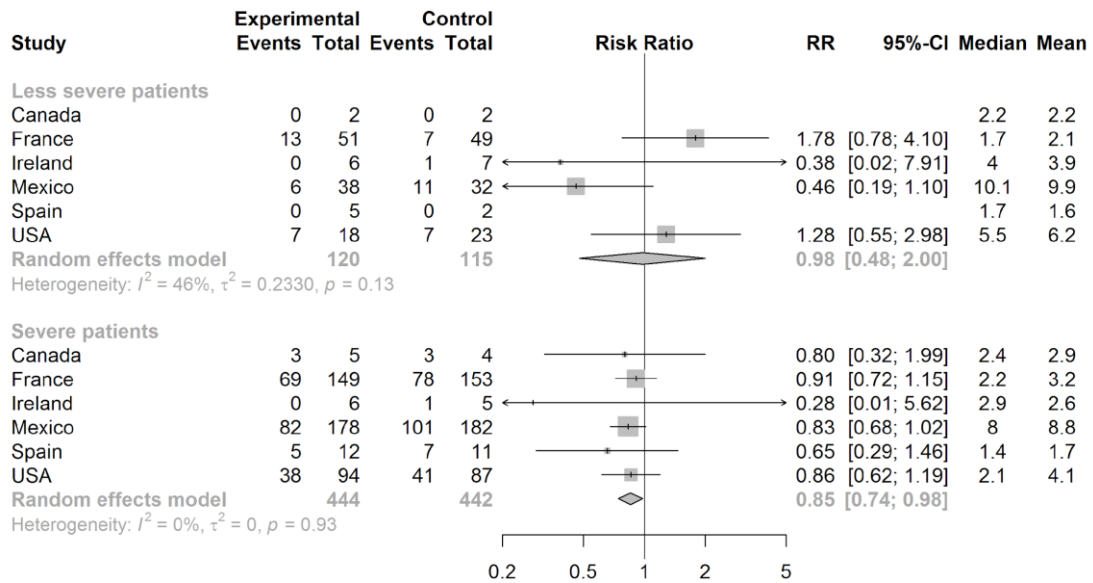

**Figure S6: Subgroup analysis of the primary outcome according to the severity at enrollment. Interaction test  $p=0.62$ . Median and mean durations of prone positioning sessions in hours**

### **3.7 Per-protocol analysis**

Patients in the standard care group who remained in APP for more than 1 hour during any one of the first 14 days whilst on HFNC, and patients in the APP group who stayed in APP less than 1 hour daily on average while on HFNC during the first 14 days, were excluded from the per-protocol population as defined a priori.

#### **Results:**

The per-protocol analysis was carried out, after excluding 64 patients of the standard care group who underwent off-protocol APP and 83 patients from the APP group who didn't stay in APP for a minimum of 1 hour daily when eligible as defined prospectively. In the per-protocol population, the primary outcome occurred in 195 of 481 (41%) patients in the APP group and in 221 out of 493 (45%) patients in the standard care group (relative risk 0.90, 95% CI 0.77 to 1.04).

#### **Interpretation:**

Beyond lack of power, as the adherence to the protocol may have been influenced by the course of the disease (rescue APP among the most severe patients), the APP and standard care groups of the pre-defined per-protocol population were probably no longer comparable, which precludes meaningful interpretation of this analysis.
